# Supplementary material for: Mechanistic study on Cu-catalyzed CO2 electroreduction into CH4 at simulated low overpotentials based on an improved electrochemical model
Source: Royal Society of Chemistry journal article supplement (doi:10.1039/c9cp02394a), 2019-01-01
Supplement: c9cp02394a1.pdf [file c9cp02394a1.pdf]

## Supporting Information

### Mechanistic Study on Cu-Catalyzed CO<sub>2</sub> Electroreduction into CH<sub>4</sub> at the Simulated Low Overpotentials Based on an Improved Electrochemical Model

Lihui Ou<sup>1\*</sup>, Junxiang Chen<sup>2</sup>, Yuandao Chen<sup>1</sup>, Junling Jin<sup>1</sup>

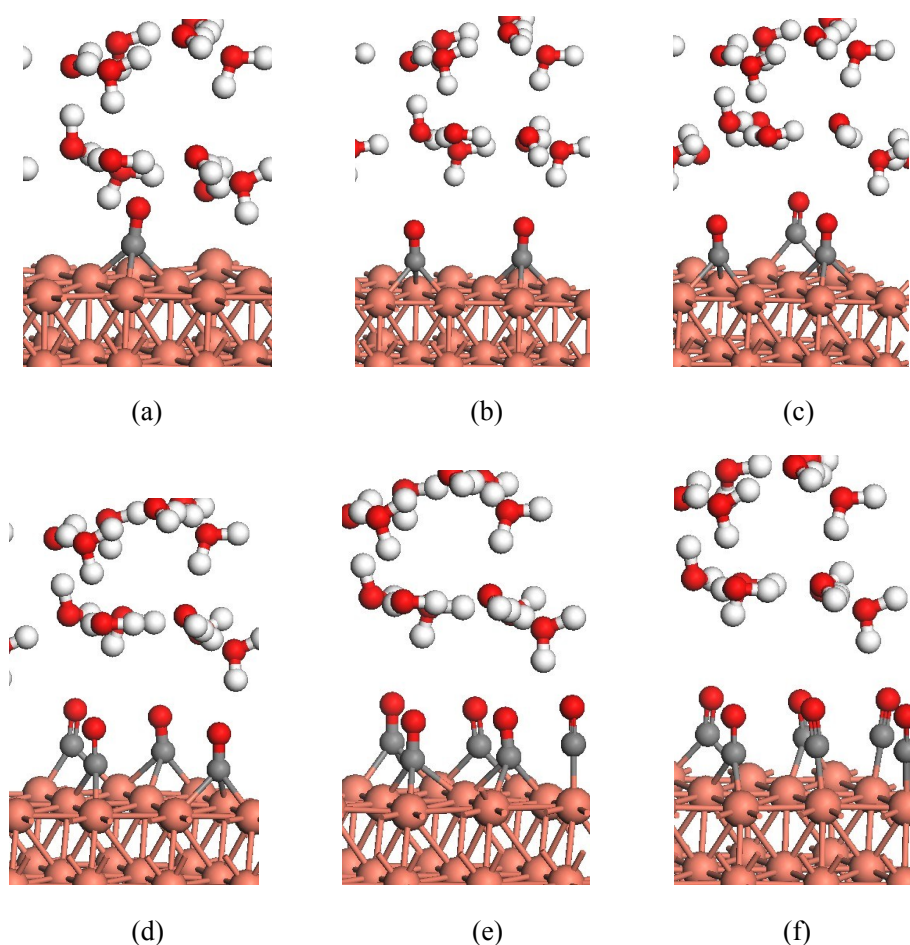

<sup>\*1</sup> Hunan Province Cooperative Innovation Center for the Construction & Development of Dongting Lake Ecologic Economic Zone, College of Chemistry and Materials Engineering, Hunan University of Arts and Science, Changde, 415000, China. E-mail: [oulihui666@126.com](mailto:oulihui666@126.com)

<sup>2</sup>CAS Key Laboratory of Design and Assembly of Functional Nanostructures, Fujian Provincial Key Laboratory of Nanomaterials, Fujian Institute of Research on the Structure of Matter, Chinese Academy of Sciences, Fuzhou, 350002, China.

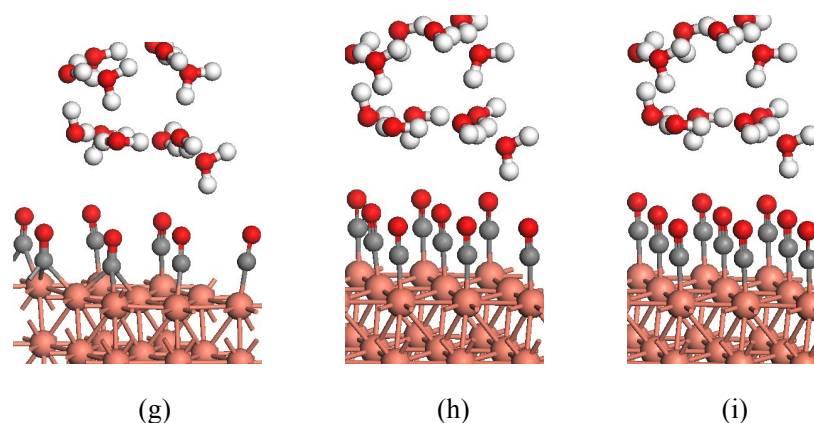

**Figure S1.** Various possible surface CO adsorption configurations on Cu(111) at different CO coverage: (a) 1/9 ML; (b) 2/9 ML; (c) 1/3 ML; (d) 4/9 ML; (e) 5/9 ML; (f) 2/3 ML; (g) 7/9 ML; (h) 8/9 ML; (i) 1ML.

**Table S1.** Activation Barriers ( $\Delta E_{\text{act}}$ , eV) and Reaction Free Energies ( $\Delta G_{\text{reac}}$ , eV) for the Possible Elementary Reaction Steps for CO<sub>2</sub> Electroreduction on Cu(111) in Aqueous Phase at the Present Simulated low Overpotential

| Reactions                                                                                | $\Delta E_{\text{act}}$ , eV <sup>a</sup> | $\Delta G_{\text{reac}}$ , eV |
|------------------------------------------------------------------------------------------|-------------------------------------------|-------------------------------|
| $\text{CO}_2^* \rightarrow (\text{CO} + \text{O})^*$                                     | 1.10                                      | 0.99                          |
| $\text{CO}_2^* + (\text{H}^+ + \text{e}^-) \rightarrow (\text{CO} + \text{OH})^*$        | 0.83                                      | 0.45                          |
| $\text{CO}_2^* + (\text{H}^+ + \text{e}^-) \rightarrow \text{COOH}^*$                    | 0.87                                      | 0.63                          |
| $\text{COOH}^* + (\text{H}^+ + \text{e}^-) \rightarrow \text{CO}^* + \text{H}_2\text{O}$ | 0.20                                      | -1.00                         |
| $\text{CO}^* + (\text{H}^+ + \text{e}^-) \rightarrow \text{CHO}^*$                       | 0.85                                      | 0.65                          |
| $\text{CO}^* + (\text{H}^+ + \text{e}^-) \rightarrow \text{COH}^*$                       | 1.39                                      | 1.09                          |
| $\text{CHO}^* \rightarrow (\text{CH} + \text{O})^*$                                      | 1.67                                      | 1.42                          |
| $\text{CHO}^* + (\text{H}^+ + \text{e}^-) \rightarrow \text{CH}_2\text{O}^*$             | 0.45                                      | -0.27                         |
| $\text{CHO}^* + (\text{H}^+ + \text{e}^-) \rightarrow \text{CHOH}^*$                     | 0.43                                      | 0.07                          |
| $\text{CH}_2\text{O}^* \rightarrow (\text{CH}_2 + \text{O})^*$                           | 1.36                                      | 0.83                          |
| $\text{CH}_2\text{O}^* + (\text{H}^+ + \text{e}^-) \rightarrow \text{CH}_2\text{OH}^*$   | 0.32                                      | -0.22                         |
| $\text{CH}_2\text{O}^* + (\text{H}^+ + \text{e}^-) \rightarrow \text{CH}_3\text{O}^*$    | 0.23                                      | -0.98                         |
| $\text{CHOH}^* \rightarrow (\text{CH} + \text{OH})^*$                                    | 0.73                                      | 0.31                          |
| $\text{CHOH}^* + (\text{H}^+ + \text{e}^-) \rightarrow \text{CH}_2\text{OH}^*$           | 0.38                                      | -0.55                         |
| $\text{CHOH}^* + (\text{H}^+ + \text{e}^-) \rightarrow \text{CH}^* + \text{H}_2\text{O}$ | 0.19                                      | 0.09                          |

|                                                                                                     |      |       |
|-----------------------------------------------------------------------------------------------------|------|-------|
| $\text{CH}_2\text{OH}^* \rightarrow (\text{CH}_2 + \text{OH})^*$                                    | 1.02 | 0.23  |
| $\text{CH}_2\text{OH}^* + (\text{H}^+ + \text{e}^-) \rightarrow \text{CH}_2^* + \text{H}_2\text{O}$ | 0.07 | -0.34 |
| $\text{CH}_2\text{OH}^* + (\text{H}^+ + \text{e}^-) \rightarrow \text{CH}_3\text{OH}^*$             | 0.36 | -0.94 |
| $\text{CH}_3\text{O}^* \rightarrow (\text{CH}_3 + \text{O})^*$                                      | 2.29 | 0.74  |
| $\text{CH}_3\text{O}^* + (\text{H}^+ + \text{e}^-) \rightarrow \text{CH}_3\text{OH}^*$              | 0.69 | -0.33 |
| $\text{CH}^* + (\text{H}^+ + \text{e}^-) \rightarrow \text{CH}_2^*$                                 | 0.33 | -0.80 |
| $\text{CH}_2^* + (\text{H}^+ + \text{e}^-) \rightarrow \text{CH}_3^*$                               | 0.32 | -1.04 |
| $\text{CH}_3^* + (\text{H}^+ + \text{e}^-) \rightarrow \text{CH}_4^*$                               | 1.31 | -0.88 |

The asterisk (\*) indicates that the species is adsorbed on Cu(111).

<sup>a</sup>In the calculations, the entropies obtained from the literature of Nørskov and coworkers are considered for gaseous molecules,<sup>1, 2</sup> whereas the entropies of the adsorbed species are ignored. The DFT calculated zero point energies (*ZPE*) for all species are included in the activation barrier and reaction free energy calculations.

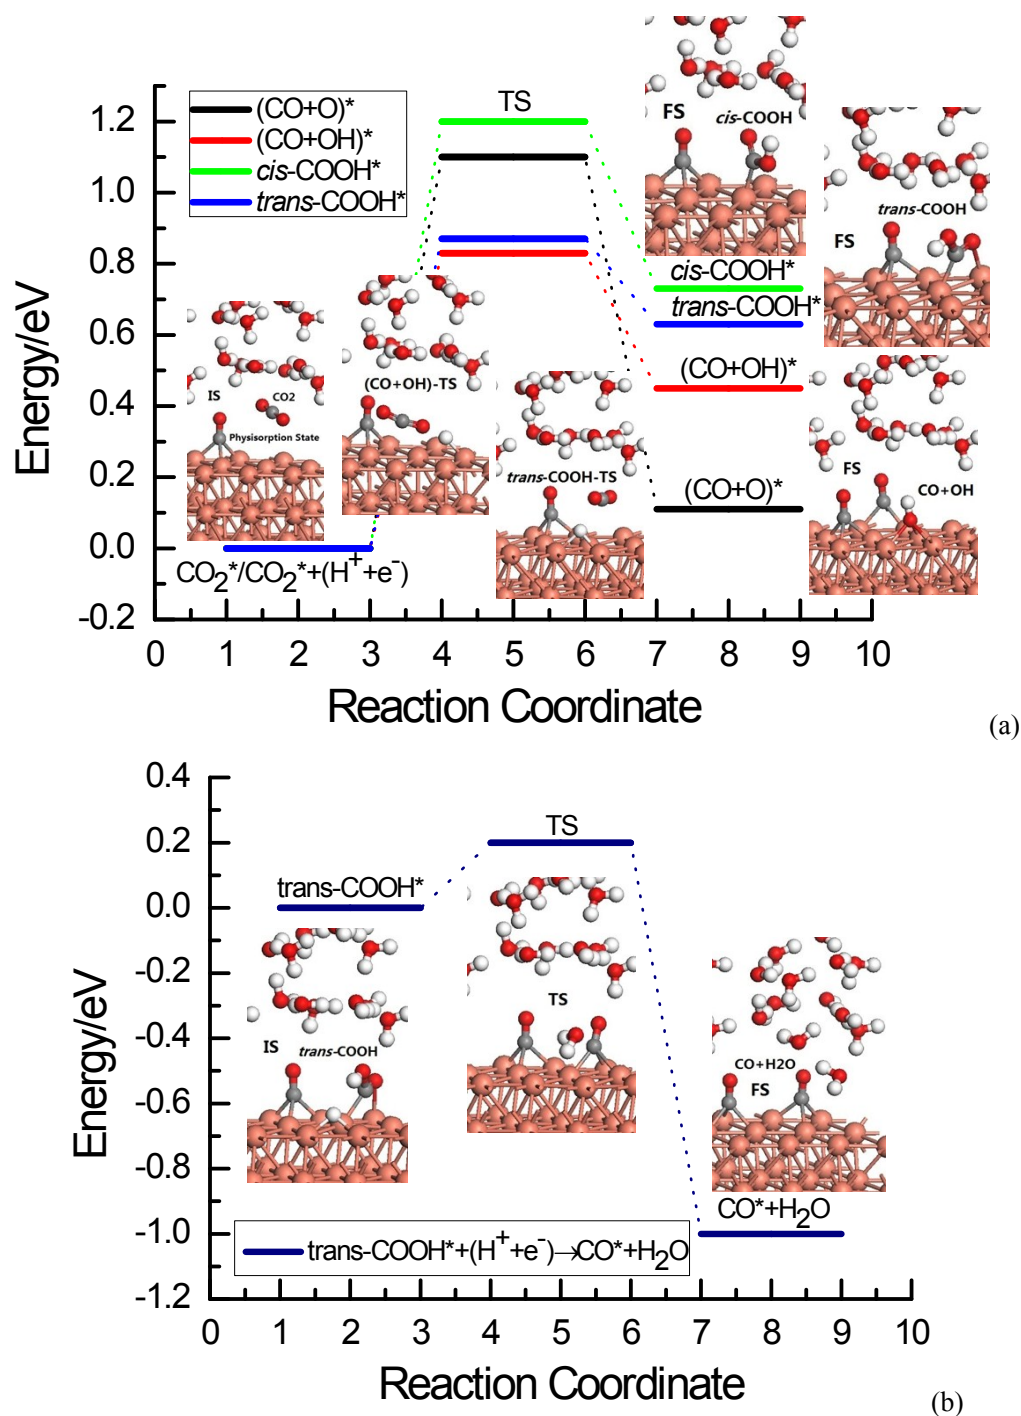

**Figure S2.** The MEP analysis of (a) the first elementary step of CO<sub>2</sub> electroreduction and (b) subsequent *trans*-COOH electroreduction into CO and H<sub>2</sub>O on Cu(111) at the present simulated low overpotential (an asterisk \* indicates adsorption to the Cu surface; IS represents Initial State, TS represents Transition State, FS represents Final State).

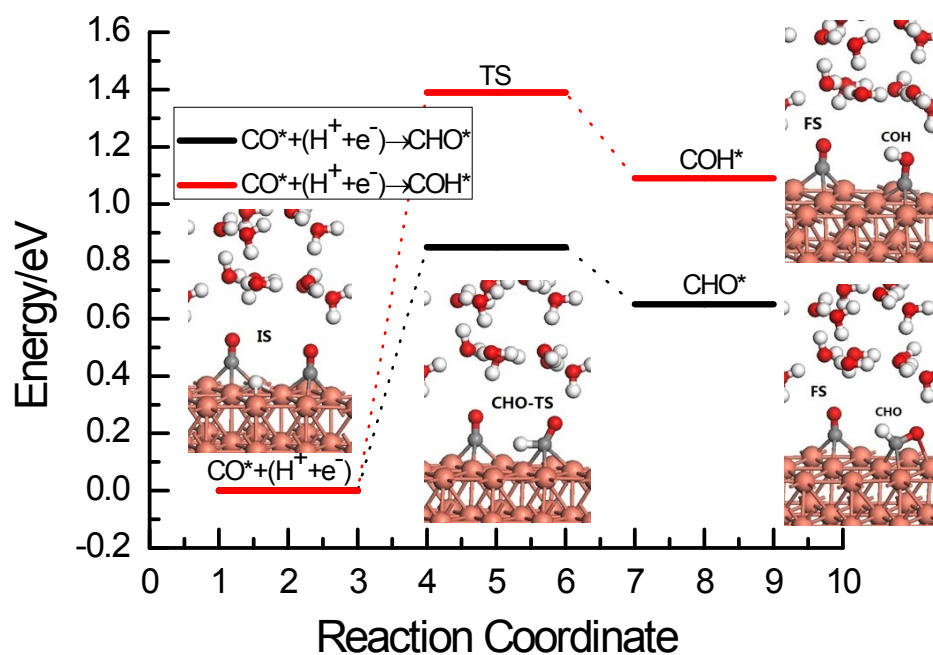

**Figure S3.** The MEP analysis of CO electroreduction into CHO and COH intermediates on Cu(111) at the present simulated low overpotential (an asterisk \* indicates adsorption to the Cu surface; IS represents Initial State, TS represents Transition State, FS represents Final State).

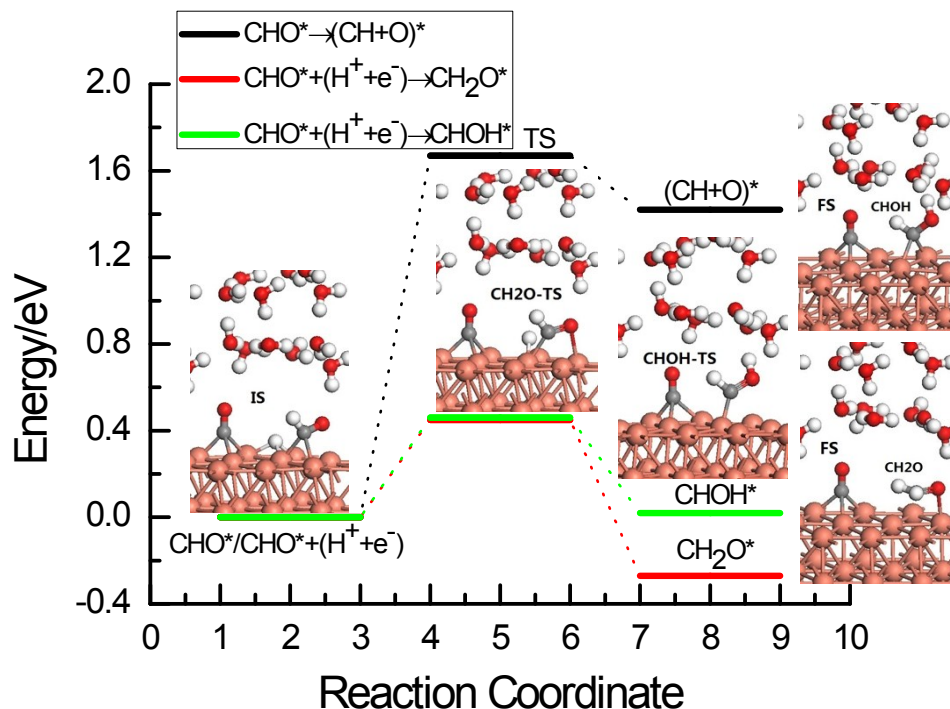

**Figure S4.** The MEP analysis of CHO electroreduction into CH<sub>2</sub>O and CHOH intermediates on Cu(111) at the present simulated low overpotential (an asterisk \* indicates adsorption to the Cu surface; IS represents Initial State, TS represents Transition State, FS represents Final State).

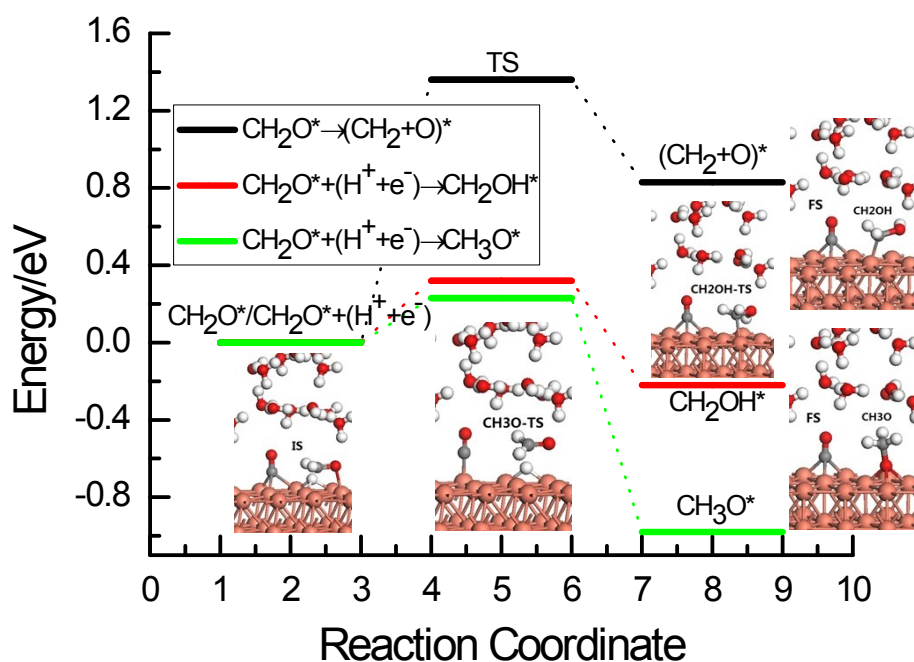

**Figure S5.** The MEP analysis of  $\text{CH}_2\text{O}$  electroreduction into  $\text{CH}_2\text{OH}$  and  $\text{CH}_3\text{O}$  intermediates on  $\text{Cu}(111)$  at the present simulated low overpotential (an asterisk \* indicates adsorption to the  $\text{Cu}$  surface; IS represents Initial State, TS represents Transition State, FS represents Final State).

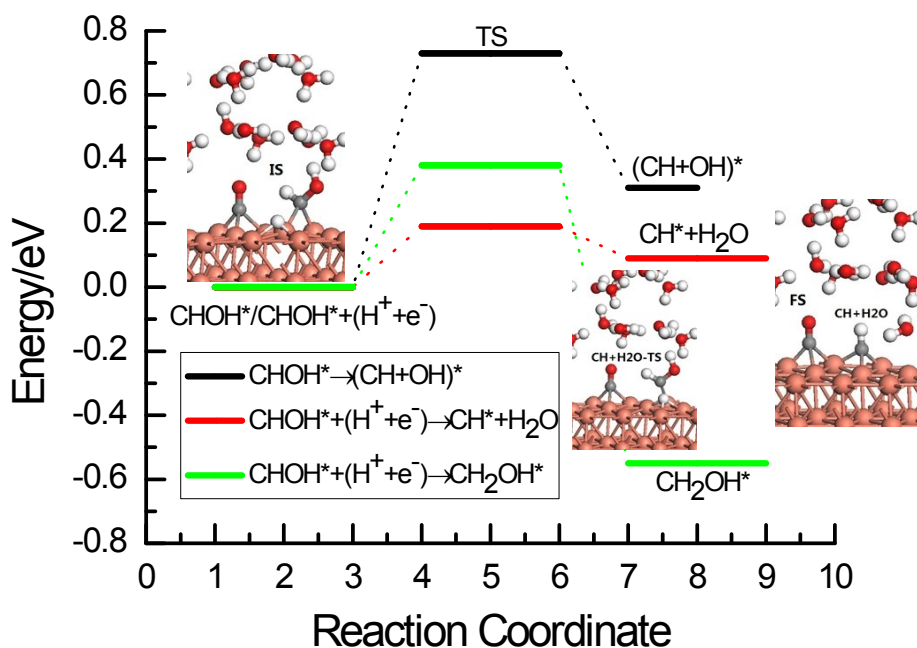

**Figure S6.** The MEP analysis of  $\text{CHOH}$  electroreduction into  $\text{CH}_2\text{OH}$  and  $\text{CH}$  intermediates on  $\text{Cu}(111)$  at the present simulated low overpotential (an asterisk \* indicates adsorption to the  $\text{Cu}$  surface; IS represents Initial State, TS represents Transition State, FS represents Final State).

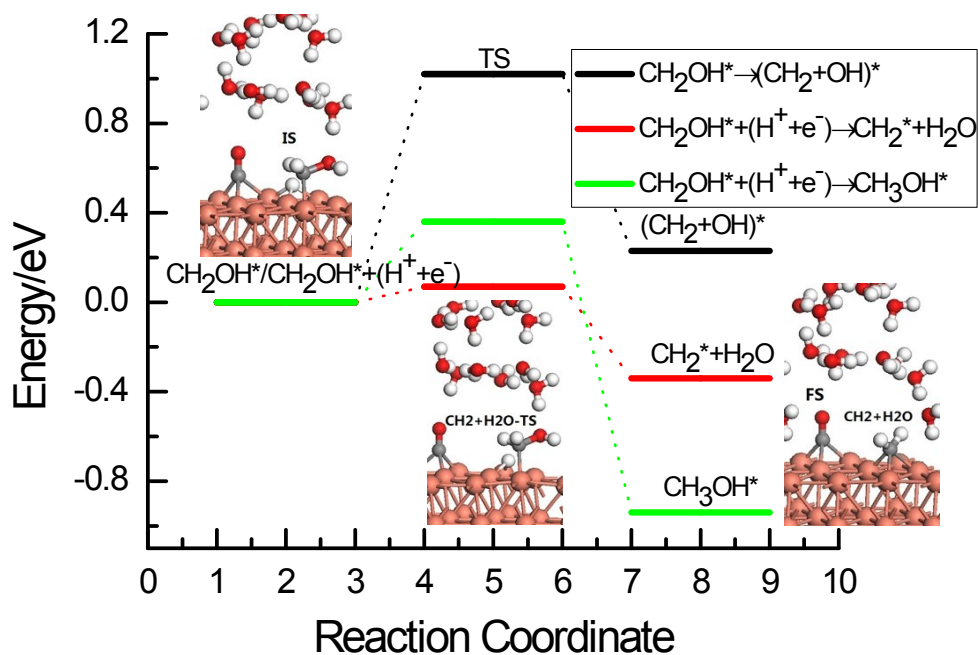

**Figure S7.** The MEP analysis of  $\text{CH}_2\text{OH}$  electroreduction into  $\text{CH}_2$  intermediate and  $\text{CH}_3\text{OH}$  production on  $\text{Cu}(111)$  at the present simulated low overpotential (an asterisk \* indicates adsorption to the  $\text{Cu}$  surface; IS represents Initial State, TS represents Transition State, FS represents Final State).

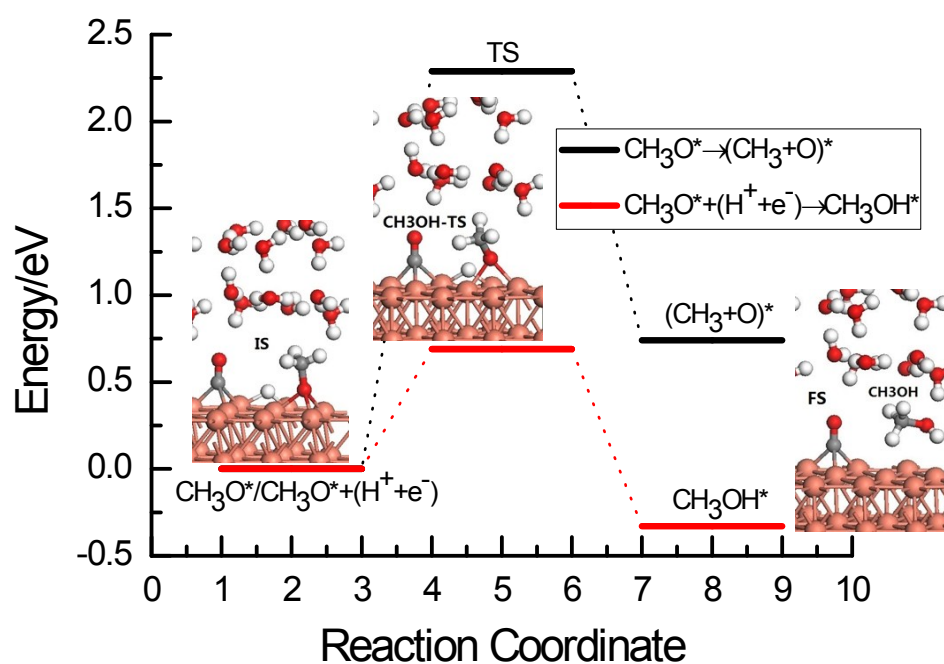

**Figure S8.** The MEP analysis of  $\text{CH}_3\text{O}$  electroreduction into  $\text{CH}_3\text{OH}$  production on  $\text{Cu}(111)$  at the present simulated low overpotential (an asterisk \* indicates adsorption to the  $\text{Cu}$  surface; IS represents Initial State, TS represents Transition State, FS represents Final State).

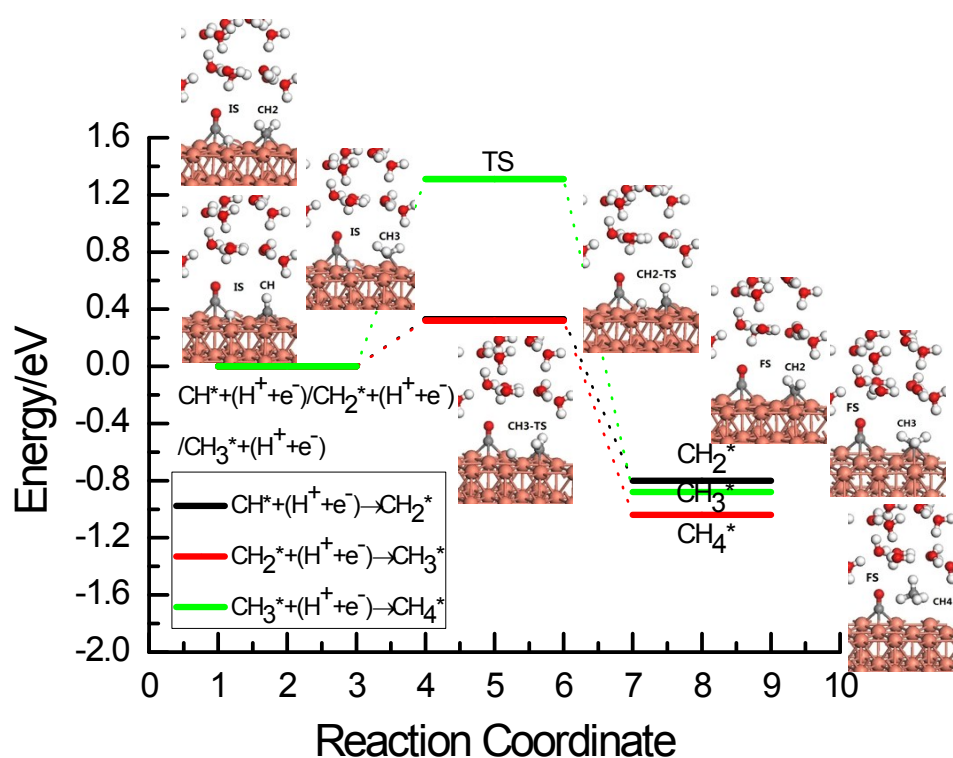

**Figure S9.** The MEP analysis of CH electroreduction into CH<sub>2</sub>, CH<sub>2</sub> electroreduction into CH<sub>3</sub> and CH<sub>3</sub> electroreduction into CH<sub>4</sub> on Cu(111) at the present simulated low overpotential (an asterisk \* indicates adsorption to the Cu surface; IS represents Initial State, TS represents Transition State, FS represents Final State).

## References

- 1 A. A. Peterson, F. Abild-Pederson, F. Studt, J. Rossmeisl and J. K. Nørskov, How Copper Catalyzes the Electroreduction of Carbon Dioxide into Hydrocarbon Fuels, *Energy Environ. Sci.*, 2010, **3**, 1311-1315.
- 2 W. J. Durand, A. A. Peterson, F. Studt, F. Abild-Pederson and J. K. Nørskov, Structure Effects on the Energetics of the Electrochemical Reduction of CO<sub>2</sub> by Copper Surfaces, *Surf. Sci.*, 2011, **605**, 1354-1359.
